# Supplementary material for: Emergence of Switch-Like Behavior in a Large Family of Simple Biochemical Networks
Source: PLoS Comput Biol. 2011 May 12;7(5):e1002039. doi: 10.1371/journal.pcbi.1002039 (PMC3093349; doi:10.1371/journal.pcbi.1002039)
Supplement: Table S2 — List of protein-protein interactions. Physical protein-protein interactions between yeast transcriptional regulators extracted from BioGRID database [81]. (XLS) [file pcbi.1002039.s003.xls]

## Sheet: TableS3
Supplementary Table S2: Physical protein-protein interactions between yeast transcriptional regulators extracted from BioGRID database.
Transcriptional Regulatory Protein	Transcriptional Regulatory Protein	Experimental Evidence	PubMed ID
A1p	Mcm1p	Reconstituted Complex	15118075
Adr1p	Snf1p	Co-localization	12167649
Adr1p	Cat8p	Co-localization	15743812
Aft1p	Aft1p	Two-hybrid	17538022
Aft1p	Aft1p	Affinity Capture-Western	17538022
Aft1p	Cbf1p	Two-hybrid	16172405
Aft1p	Yap5p	Two-hybrid	10688190
Arg80p	Arg81p	Two-hybrid	10632874
Arg80p	Arg81p	Two-hybrid	12138185
Arg80p	Arg81p	Two-hybrid	10688655
Arg80p	Arg81p	Affinity Capture-Western	10688655
Arg80p	Mcm1p	Two-hybrid	10632874
Arg80p	Mcm1p	Two-hybrid	12138185
Arg80p	Mcm1p	Affinity Capture-Western	15289616
Arg80p	Ume6p	Two-hybrid	10809695
Arg81p	Arg81p	Two-hybrid	10632874
Arg81p	Mcm1p	Two-hybrid	10632874
Arg81p	Mcm1p	Two-hybrid	10688655
Arg81p	Mcm1p	Affinity Capture-Western	10688655
Arg81p	Ume6p	Two-hybrid	10809695
Ash1p	Ash1p	Affinity Capture-MS	16314178
Ash1p	Ume6p	Affinity Capture-MS	16314178
Bas1p	Pho2p	Two-hybrid	19528318
Bas1p	Pho2p	Affinity Capture-Western	12110691
Bas1p	Pho2p	Two-hybrid	12110691
Bas1p	Pho2p	Two-hybrid	11689683
Bas1p	Pho2p	Two-hybrid	11095676
Cbf1p	Cbf1p	PCA	18467557
Cbf1p	Cbf1p	Reconstituted Complex	9894911
Cbf1p	Met28p	Two-hybrid	8665859
Cbf1p	Met28p	Reconstituted Complex	9171357
Cbf1p	Met32p	Co-purification	18308733
Cbf1p	Met4p	Affinity Capture-Western	18308733
Cbf1p	Met4p	Two-hybrid	8665859
Cbf1p	Met4p	Reconstituted Complex	9171357
Cbf1p	Cep3p	Reconstituted Complex	11070082
Crz1p	Skn7p	Reconstituted Complex	11432834
Cst6p	Kss1p	Biochemical Activity	16319894
Cst6p	Oaf1p	Affinity Capture-MS	16554755
Dal80p	Dal80p	Two-hybrid	18719252
Dal80p	Dal80p	Two-hybrid	9791119
Dal80p	Gzf3p	Two-hybrid	9791119
Dal80p	Ydr520cp	Two-hybrid	11283351
Dal80p	Ydr520cp	Two-hybrid	18719252
Dal81p	Dal82p	Two-hybrid	10906145
Dal82p	Dal82p	Two-hybrid	10688190
Dig1p	Dig1p	Two-hybrid	18719252
Dig1p	Gts1p	Two-hybrid	18719252
Dig1p	Kss1p	Two-hybrid	18719252
Dig1p	Kss1p	Affinity Capture-Western	8918885
Dig1p	Kss1p	Reconstituted Complex	14734536
Dig1p	Kss1p	Two-hybrid	8918885
Dig1p	Kss1p	Two-hybrid	9094309
Dig1p	Kss1p	Biochemical Activity	8918885
Dig1p	Kss1p	Biochemical Activity	11525741
Dig1p	Kss1p	Affinity Capture-MS	11805837
Dig1p	Pho4p	Affinity Capture-MS	14660704
Dig1p	Ste12p	Affinity Capture-MS	17200106
Dig1p	Ste12p	Two-hybrid	18719252
Dig1p	Ste12p	FRET	19079053
Dig1p	Ste12p	Affinity Capture-Western	8918885
Dig1p	Ste12p	Reconstituted Complex	10825185
Dig1p	Ste12p	Two-hybrid	9343403
Dig1p	Ste12p	Affinity Capture-MS	12590263
Dig1p	Ste12p	Affinity Capture-Western	9094309
Dig1p	Ste12p	Two-hybrid	9094309
Dig1p	Ste12p	Affinity Capture-MS	16554755
Dig1p	Ste12p	Reconstituted Complex	16782869
Dig1p	Tec1p	Affinity Capture-Western	19218425
Dig1p	Tec1p	Affinity Capture-Western	16782869
Dig1p	Tec1p	Reconstituted Complex	16782869
Ecm22p	Mot3p	Affinity Capture-Western	16783004
Esf2p	Esf2p	Affinity Capture-MS	15964808
Esf2p	Kre33p	Affinity Capture-MS	16554755
Fhl1p	Ifh1p	Two-hybrid	15620355
Fhl1p	Ifh1p	Affinity Capture-Western	15620355
Fhl1p	Ifh1p	Affinity Capture-Western	15692568
Fhl1p	Rap1p	Affinity Capture-Western	17452446
Fkh1p	Mbp1p	Affinity Capture-MS	11805837
Fkh2p	Mcm1p	Reconstituted Complex	12711672
Fkh2p	Mcm1p	Reconstituted Complex	10959837
Fkh2p	Mcm1p	Reconstituted Complex	10899128
Fkh2p	Mcm1p	Reconstituted Complex	10894549
Fkh2p	Ndd1p	Affinity Capture-Western	12865300
Fkh2p	Ndd1p	Reconstituted Complex	15509804
Fkh2p	Ndd1p	Affinity Capture-Western	15509804
Gal3p	Gal4p	Reconstituted Complex	9670023
Gal3p	Gal80p	Affinity Capture-Western	18245852
Gal3p	Gal80p	Reconstituted Complex	18245852
Gal3p	Gal80p	Two-hybrid	18245852
Gal3p	Gal80p	FRET	18952899
Gal3p	Gal80p	Affinity Capture-Western	9050845
Gal3p	Gal80p	Affinity Capture-Western	9111326
Gal3p	Gal80p	Affinity Capture-Western	8628318
Gal3p	Gal80p	Reconstituted Complex	9670023
Gal3p	Gal80p	Reconstituted Complex	15998719
Gal3p	Gal80p	Two-hybrid	16219783
Gal3p	Gal80p	Co-purification	11964151
Gal4p	Gal4p	Co-crystal Structure	18611375
Gal4p	Gal4p	Reconstituted Complex	18611375
Gal4p	Gal4p	Co-crystal Structure	1557122
Gal4p	Gal80p	Co-crystal Structure	18292341
Gal4p	Gal80p	Affinity Capture-Western	11418596
Gal4p	Gal80p	Affinity Capture-Western	7739564
Gal4p	Gal80p	Protein-peptide	12706896
Gal4p	Gal80p	Reconstituted Complex	10966808
Gal4p	Gal80p	Reconstituted Complex	15998719
Gal4p	Gal80p	Two-hybrid	11418596
Gal4p	Gal80p	Affinity Capture-Western	10523671
Gal4p	Gal80p	Two-hybrid	10523671
Gal4p	Gal80p	Affinity Capture-Western	12417740
Gal4p	Gal80p	Reconstituted Complex	10809742
Gal4p	Gal80p	Reconstituted Complex	9670023
Gal4p	Gal80p	Reconstituted Complex	8670900
Gal4p	Gal80p	Two-hybrid	9159467
Gal4p	Gal80p	Affinity Capture-Western	3316976
Gal4p	Gal80p	Reconstituted Complex	3316976
Gal4p	Gal80p	Reconstituted Complex	1985957
Gal4p	Gal80p	Two-hybrid	11095729
Gal4p	Gal80p	Reconstituted Complex	11478912
Gal4p	Gal80p	Two-hybrid	15695361
Gal4p	Gal80p	Affinity Capture-Western	15695361
Gal4p	Gal80p	Co-purification	1406674
Gal4p	Hap5p	Two-hybrid	11418596
Gal4p	Ino2p	Reconstituted Complex	15719021
Gal4p	Rap1p	Two-hybrid	17919657
Gal4p	Snf1p	Reconstituted Complex	15719021
Gal80p	Gal80p	PCA	18467557
Gal80p	Gal80p	Reconstituted Complex	11179228
Gal80p	Gal80p	Two-hybrid	15695361
Gal80p	Ino2p	Two-hybrid	18719252
Gal80p	Pho2p	Two-hybrid	18719252
Gal80p	Put3p	Two-hybrid	18719252
Gal80p	Rtg1p	Two-hybrid	18719252
Gal80p	Swi5p	Two-hybrid	18719252
Gal80p	Yer130cp	Two-hybrid	18719252
Gal80p	Hcm1p	Two-hybrid	18719252
Gcn4p	Gcn4p	Protein-peptide	19331323
Gcn4p	Gcn4p	Reconstituted Complex	3678204
Gcn4p	Mbf1p	Affinity Capture-Western	9710580
Gcn4p	Mbf1p	Reconstituted Complex	9710580
Gcn4p	Met31p	Two-hybrid	10688190
Gcr1p	Gcr2p	Two-hybrid	7713414
Gcr1p	Gcr2p	Two-hybrid	1508187
Gcr1p	Rap1p	Affinity Capture-Western	8508768
Gcr1p	Rap1p	Reconstituted Complex	8649429
Gcr1p	Rap1p	Reconstituted Complex	9826662
Gcr1p	Rap1p	Two-hybrid	15300680
Gln3p	Gln3p	Reconstituted Complex	19345193
Gln3p	Met4p	Affinity Capture-MS	16554755
Gln3p	Snf1p	Affinity Capture-Western	11809814
Gln3p	Snf1p	Two-hybrid	11809814
Gln3p	Snf1p	Biochemical Activity	11809814
Gts1p	Gts1p	Reconstituted Complex	19345193
Gts1p	Rgm1p	Two-hybrid	18719252
Gts1p	Yap6p	Two-hybrid	11283351
Gzf3p	Gzf3p	Two-hybrid	9791119
Gzf3p	Snf1p	Biochemical Activity	16319894
Gzf3p	Ydr520cp	Two-hybrid	18719252
Gzf3p	Cep3p	Two-hybrid	17634282
Hac1p	Hac1p	Two-hybrid	8932376
Hal9p	Tbs1p	Two-hybrid	18719252
Hap1p	Hap1p	Reconstituted Complex	10428861
Hap1p	Hap1p	Reconstituted Complex	8464899
Hap2p	Hap3p	Affinity Capture-MS	17200106
Hap2p	Hap3p	Two-hybrid	11283351
Hap2p	Hap3p	Reconstituted Complex	10972830
Hap2p	Hap3p	Affinity Capture-MS	16554755
Hap2p	Hap3p	Reconstituted Complex	16278450
Hap2p	Hap4p	Reconstituted Complex	9372932
Hap2p	Hap4p	Reconstituted Complex	16278450
Hap2p	Hap5p	Affinity Capture-MS	17200106
Hap2p	Hap5p	Two-hybrid	11283351
Hap2p	Hap5p	Reconstituted Complex	7828851
Hap2p	Hap5p	Affinity Capture-MS	11805826
Hap2p	Hap5p	Reconstituted Complex	10972830
Hap2p	Hap5p	Affinity Capture-MS	11805837
Hap2p	Hap5p	Affinity Capture-MS	16554755
Hap2p	Hap5p	Reconstituted Complex	16278450
Hap3p	Hap4p	Reconstituted Complex	9372932
Hap3p	Hap4p	Reconstituted Complex	16278450
Hap3p	Hap5p	Affinity Capture-MS	17200106
Hap3p	Hap5p	Two-hybrid	11283351
Hap3p	Hap5p	Reconstituted Complex	7828851
Hap3p	Hap5p	Reconstituted Complex	10972830
Hap3p	Hap5p	Affinity Capture-MS	16554755
Hap4p	Hap5p	Reconstituted Complex	9372932
Hap4p	Hap5p	Reconstituted Complex	16278450
Hir1p	Hir1p	Affinity Capture-Western	9504914
Hir1p	Hir1p	Affinity Capture-Western	9001207
Hir1p	Hir2p	Affinity Capture-MS	17200106
Hir1p	Hir2p	Affinity Capture-Western	9504914
Hir1p	Hir2p	Affinity Capture-Western	9001207
Hir1p	Hir2p	Affinity Capture-MS	16264190
Hir1p	Hir3p	Affinity Capture-MS	16264190
Hir2p	Hir3p	Affinity Capture-MS	17200106
Hir2p	Hir3p	Affinity Capture-MS	16264190
Hog1p	Sko1p	Affinity Capture-Western	11230135
Hog1p	Sko1p	Affinity Capture-Western	12086627
Hog1p	Sko1p	Reconstituted Complex	12086627
Hog1p	Sko1p	Biochemical Activity	11230135
Hog1p	Smp1p	Affinity Capture-Western	12482976
Hog1p	Smp1p	Two-hybrid	12482976
Hog1p	Smp1p	Biochemical Activity	12482976
Hog1p	Rsc3p	Affinity Capture-Western	19153600
Hog1p	Hot1p	Two-hybrid	10409737
Hog1p	Hot1p	Two-hybrid	12743037
Hog1p	Hot1p	Biochemical Activity	12743037
Hsf1p	Msn2p	Co-localization	18070923
Hsf1p	Msn4p	Co-localization	18070923
Hsf1p	Skn7p	Affinity Capture-Western	10888672
Hsf1p	Snf1p	Biochemical Activity	18793336
Hsf1p	Snf1p	Two-hybrid	14612437
Hsf1p	Snf1p	Biochemical Activity	14612437
Ifh1p	Rap1p	Affinity Capture-Western	17452446
Ime1p	Ime1p	Two-hybrid	8628320
Ime1p	Ume6p	Two-hybrid	10545448
Ime1p	Ume6p	Two-hybrid	9372955
Ime1p	Ume6p	Two-hybrid	9111339
Ime1p	Ume6p	Two-hybrid	9889189
Ime1p	Ume6p	Two-hybrid	8628320
Ime4p	Kar4p	Two-hybrid	11283351
Ino2p	Ino4p	Two-hybrid	10688190
Ino2p	Ino4p	Two-hybrid	18542964
Ino2p	Ino4p	Affinity Capture-Western	11071933
Ino2p	Ino4p	Far Western	7862526
Ino2p	Ino4p	Reconstituted Complex	10747047
Ino2p	Ino4p	Reconstituted Complex	10361278
Ino2p	Ino4p	Two-hybrid	11071933
Ino2p	Ino4p	Two-hybrid	7862526
Ino2p	Ino4p	Affinity Capture-Western	8195172
Ino2p	Ino4p	Affinity Capture-MS	16554755
Ino2p	Opi1p	Affinity Capture-Western	12753200
Ino2p	Opi1p	Affinity Capture-Western	11454208
Ino2p	Opi1p	Reconstituted Complex	11454208
Ino2p	Opi1p	Reconstituted Complex	15819625
Ino2p	Opi1p	Two-hybrid	15819625
Ino4p	Opi1p	Two-hybrid	15819625
Ino4p	Pho4p	Affinity Capture-Western	11071933
Ino4p	Pho4p	Two-hybrid	11071933
Ino4p	Rtg1p	Two-hybrid	11071933
Ino4p	Rtg3p	Affinity Capture-Western	11071933
Ino4p	Rtg3p	Two-hybrid	11071933
Ino4p	Tye7p	Affinity Capture-Western	11071933
Ino4p	Tye7p	Two-hybrid	11071933
Kss1p	Sip4p	Biochemical Activity	16319894
Kss1p	Ste12p	Two-hybrid	18719252
Kss1p	Ste12p	Reconstituted Complex	14734536
Kss1p	Ste12p	Reconstituted Complex	9744865
Kss1p	Ste12p	Two-hybrid	7851759
Kss1p	Ste12p	Reconstituted Complex	9393860
Kss1p	Ste12p	Biochemical Activity	11525741
Kss1p	Ste12p	Affinity Capture-MS	11805837
Kss1p	Tec1p	Affinity Capture-Western	15558284
Kss1p	Tec1p	Affinity Capture-MS	11805837
Kss1p	Asg1p	Biochemical Activity	16319894
Mac1p	Mac1p	Two-hybrid	18719252
Mac1p	Mac1p	Two-hybrid	10506178
Mac1p	Mac1p	Two-hybrid	9867833
Mac1p	Mac1p	Two-hybrid	11297731
Mbp1p	Skn7p	Reconstituted Complex	10512874
Mbp1p	Skn7p	Two-hybrid	10512874
Mbp1p	Swi6p	Affinity Capture-MS	17200106
Mbp1p	Swi6p	Two-hybrid	19820714
Mbp1p	Swi6p	Affinity Capture-Western	19820714
Mbp1p	Swi6p	Reconstituted Complex	19820714
Mbp1p	Swi6p	Affinity Capture-Western	8649372
Mbp1p	Swi6p	Two-hybrid	10512874
Mbp1p	Swi6p	Affinity Capture-MS	11805826
Mbp1p	Swi6p	Affinity Capture-MS	16554755
Mcm1p	Mcm1p	Two-hybrid	10632874
Mcm1p	Ste12p	Reconstituted Complex	1756728
Mcm1p	Ste12p	Reconstituted Complex	8139556
Mcm1p	Yhp1p	Affinity Capture-Western	12464633
Mcm1p	Yox1p	Affinity Capture-Western	12464633
Met28p	Met4p	Affinity Capture-Western	17157252
Met28p	Met4p	Two-hybrid	9799240
Met28p	Met4p	Reconstituted Complex	9171357
Met28p	Met4p	Two-hybrid	8665859
Met31p	Met4p	Affinity Capture-Western	17157252
Met31p	Met4p	Two-hybrid	9799240
Met31p	Met4p	Reconstituted Complex	9799240
Met32p	Met4p	Two-hybrid	9799240
Met32p	Met4p	Reconstituted Complex	9799240
Met4p	Met4p	Two-hybrid	11087867
Mig1p	Snf1p	Affinity Capture-Western	17178716
Mig1p	Snf1p	Biochemical Activity	12748292
Mig1p	Snf1p	Affinity Capture-Western	9774644
Mig1p	Snf1p	Two-hybrid	9774644
Mig1p	Snf1p	Biochemical Activity	12684376
Mig1p	Snf1p	Biochemical Activity	12393914
Mig1p	Snf1p	Biochemical Activity	10403407
Mig1p	Snf1p	Biochemical Activity	16319894
Mig1p	Snf1p	Biochemical Activity	16847059
Mig3p	Snf1p	Biochemical Activity	14993292
Mot2p	Mot2p	Affinity Capture-Western	19707589
Mot3p	Mot3p	PCA	18467557
Mot3p	Mot3p	Reconstituted Complex	19345193
Msn1p	Ydr520cp	Two-hybrid	18719252
Msn1p	Ygr067cp	Two-hybrid	18719252
Msn2p	Snf1p	Biochemical Activity	16281053
Msn2p	Sok2p	Affinity Capture-Western	11238897
Mss11p	Ste12p	Affinity Capture-Western	15485921
Mss11p	Tec1p	Affinity Capture-Western	15485921
Mss11p	Flo8p	Affinity Capture-Western	15485921
Mth1p	Rgt1p	Affinity Capture-Western	14508605
Mth1p	Rgt1p	Two-hybrid	14508605
Mth1p	Rgt1p	Two-hybrid	15489524
Mth1p	Rgt1p	Reconstituted Complex	15489524
Nnf2p	Nnf2p	Two-hybrid	11087867
Nnf2p	Swi5p	Two-hybrid	11087867
Nrg1p	Rim101p	Affinity Capture-Western	16024810
Nrg1p	Snf1p	Affinity Capture-Western	11404322
Oaf1p	Oaf1p	Reconstituted Complex	18671944
Oaf1p	Oaf1p	Co-localization	9288897
Oaf1p	Pip2p	Reconstituted Complex	18671944
Oaf1p	Pip2p	Co-localization	18285336
Oaf1p	Pip2p	Affinity Capture-Western	8972187
Oaf1p	Pip2p	Reconstituted Complex	12709061
Oaf1p	Pip2p	Co-localization	9288897
Pdr1p	Pdr1p	Reconstituted Complex	19345193
Pdr1p	Pdr3p	Co-fractionation	12453227
Pdr1p	Stb5p	Affinity Capture-Western	15123673
Pdr1p	Stb5p	Reconstituted Complex	15123673
Pho2p	Pho4p	Two-hybrid	19528318
Pho2p	Pho4p	Affinity Capture-Western	19528318
Pho2p	Pho4p	Affinity Capture-Western	9354395
Pho2p	Pho4p	Reconstituted Complex	12136204
Pho2p	Pho4p	Reconstituted Complex	7957107
Pho2p	Pho4p	Two-hybrid	12219216
Pho2p	Pho4p	Two-hybrid	8676879
Pho2p	Pho4p	Reconstituted Complex	10884387
Pho2p	Pho4p	Two-hybrid	10884387
Pho2p	Pho4p	Reconstituted Complex	10320381
Pho2p	Swi5p	Reconstituted Complex	9111337
Pho2p	Swi5p	Reconstituted Complex	7493941
Pho2p	Swi5p	Reconstituted Complex	8355698
Pho2p	Swi5p	Reconstituted Complex	7902583
Pho2p	Swi5p	Reconstituted Complex	9774660
Pho2p	Swi5p	Two-hybrid	9774660
Pho4p	Pho4p	Two-hybrid	18719252
Pho4p	Pho4p	Reconstituted Complex	9443961
Pho4p	Pho4p	Protein-peptide	11967834
Pho4p	Pho4p	Co-crystal Structure	9303313
Pho4p	Snf1p	Affinity Capture-MS	14660704
Ppr1p	Ppr1p	Co-crystal Structure	7958913
Put3p	Put3p	Co-crystal Structure	9303003
Put3p	Put3p	Co-crystal Structure	9303004
Put3p	Put3p	Reconstituted Complex	8846888
Rco1p	Rco1p	Affinity Capture-MS	16286008
Rdr1p	Rdr1p	Two-hybrid	11283351
Reb1p	Reb1p	Affinity Capture-MS	14759368
Reb1p	Rfx1p	Affinity Capture-MS	11805826
Reb1p	Rsc3p	Affinity Capture-MS	11805826
Reb1p	Rsc3p	Affinity Capture-MS	16429126
Rfx1p	Rsc3p	Affinity Capture-MS	11805826
Rgt1p	Rgt1p	Two-hybrid	15489524
Rim101p	Zap1p	Two-hybrid	10688190
Rlm1p	Rlm1p	Reconstituted Complex	19345193
Rlm1p	Smp1p	Affinity Capture-Western	9121433
Rtg1p	Rtg3p	Affinity Capture-MS	17200106
Rtg1p	Rtg3p	Two-hybrid	9242640
Rtg1p	Rtg3p	Affinity Capture-Western	10848632
Rtg1p	Rtg3p	Reconstituted Complex	9032238
Rtg1p	Rtg3p	Affinity Capture-MS	16554755
Sfl1p	Sfl1p	Affinity Capture-Western	12024012
Sip3p	Snf1p	Two-hybrid	8127709
Sip3p	Snf1p	Two-hybrid	1496382
Sip4p	Sip4p	Two-hybrid	11486018
Sip4p	Snf1p	Affinity Capture-Western	10581241
Sip4p	Snf1p	Two-hybrid	11486018
Sip4p	Snf1p	Two-hybrid	10581241
Sip4p	Snf1p	Two-hybrid	8628258
Sip4p	Cat8p	Two-hybrid	11486018
Skn7p	Skn7p	Affinity Capture-Western	10888672
Skn7p	Skn7p	Two-hybrid	8598053
Skn7p	Skn7p	Protein-peptide	11967834
Sko1p	Sko1p	Affinity Capture-Western	11500510
Smk1p	Yap7p	Affinity Capture-MS	16554755
Snf1p	Snf1p	Co-crystal Structure	16531232
Snf1p	Snf1p	Reconstituted Complex	16531232
Snf1p	Snf1p	Affinity Capture-Western	16531232
Snf1p	Snf1p	Biochemical Activity	12748292
Snf1p	Nrg2p	Affinity Capture-Western	11404322
Snf1p	Nrg2p	Two-hybrid	11404322
Snf1p	Gsm1p	Biochemical Activity	16319894
Snf1p	Rds2p	Biochemical Activity	17875938
Snf1p	Rds2p	Biochemical Activity	16319894
Snt2p	Xbp1p	Affinity Capture-MS	16554755
Sok2p	Sok2p	Reconstituted Complex	19345193
Spt2p	Spt2p	Affinity Capture-Western	9632800
Spt23p	Spt23p	Two-hybrid	11733065
Spt23p	Spt23p	Affinity Capture-Western	11733065
Spt23p	Yfl044cp	Affinity Capture-Western	16427015
Stb1p	Swi6p	Affinity Capture-Western	18794370
Stb1p	Swi6p	Affinity Capture-Western	10409718
Stb1p	Swi6p	Reconstituted Complex	12832490
Stb4p	Swi5p	Affinity Capture-MS	11805837
Stb5p	Stb5p	Affinity Capture-Western	15123673
Ste12p	Tec1p	Reconstituted Complex	9036858
Ste12p	Tec1p	Reconstituted Complex	9234690
Ste12p	Tec1p	Affinity Capture-MS	11805837
Ste12p	Tec1p	Affinity Capture-Western	16782869
Ste12p	Tec1p	Reconstituted Complex	16782869
Ste12p	Flo8p	Affinity Capture-Western	15485921
Sum1p	Sum1p	Affinity Capture-Western	18268008
Swi4p	Swi4p	Reconstituted Complex	10490612
Swi4p	Swi6p	Affinity Capture-MS	17200106
Swi4p	Swi6p	Two-hybrid	19820714
Swi4p	Swi6p	Affinity Capture-Western	19820714
Swi4p	Swi6p	Reconstituted Complex	19820714
Swi4p	Swi6p	Affinity Capture-Western	12024050
Swi4p	Swi6p	Affinity Capture-Western	8649372
Swi4p	Swi6p	Reconstituted Complex	10490612
Swi4p	Swi6p	Reconstituted Complex	9521763
Swi4p	Swi6p	Reconstituted Complex	2649246
Swi4p	Swi6p	Reconstituted Complex	1465410
Swi4p	Swi6p	Affinity Capture-MS	16554755
Swi4p	Swi6p	Affinity Capture-MS	16429126
Tec1p	Flo8p	Affinity Capture-Western	15485921
Tho2p	Tho2p	Affinity Capture-MS	14759368
Ume6p	Ume6p	Affinity Capture-MS	16314178
Ume6p	Tea1p	Two-hybrid	11238941
Wtm1p	Wtm1p	Affinity Capture-Western	9234739
Wtm1p	Wtm1p	Two-hybrid	9234739
Wtm1p	Wtm2p	Two-hybrid	18719252
Wtm1p	Wtm2p	Affinity Capture-Western	9234739
Wtm1p	Wtm2p	Two-hybrid	9234739
Wtm1p	Wtm2p	Affinity Capture-MS	11805837
Wtm2p	Wtm2p	PCA	18467557
Wtm2p	Wtm2p	Two-hybrid	18719252
Wtm2p	Wtm2p	Affinity Capture-Western	9234739
Wtm2p	Wtm2p	Two-hybrid	9234739
Yap5p	Yap5p	Protein-peptide	11967834
Ybr239cp	Rds2p	Two-hybrid	11283351
Ybr267wp	Ybr267wp	Affinity Capture-MS	14759368
Ybr267wp	Ybr267wp	Affinity Capture-Western	16651379
Ydr266cp	Ydr266cp	Protein-peptide	11967834
Ydr520cp	Ydr520cp	Two-hybrid	18719252
Ydr520cp	Ydr520cp	Protein-peptide	11967834
Yer184cp	Yer184cp	Two-hybrid	18719252
Ypr022cp	Ypr022cp	Reconstituted Complex	19345193
Yrr1p	Yrr1p	Two-hybrid	18719252
Yrr1p	Yrr1p	Affinity Capture-Western	15123673
Yrr1p	Yrr1p	Reconstituted Complex	15123673
Gis1p	Mga2p	Two-hybrid	17043893
Rsc3p	Rsc3p	Affinity Capture-MS	14759368
Rsc3p	Rsc30p	Affinity Capture-MS	17200106
Rsc3p	Rsc30p	Affinity Capture-MS	16429126
Rsc3p	Rsc30p	Affinity Capture-Western	16204215
Chd1p	Chd1p	Affinity Capture-MS	14759368
Cep3p	Cep3p	Co-crystal Structure	18064045
Cep3p	Cep3p	Co-purification	10352012
Cef1p	Cef1p	Two-hybrid	10092627
Cat8p	Cat8p	Two-hybrid	11486018
Cat8p	Cat8p	Protein-peptide	11967834
